# Supplementary material for: Bayesian calibration of simulation models for supporting management of the elimination of the macroparasitic disease, Lymphatic Filariasis
Source: PubMed Central journal article supplement (PMC4618871; doi:10.1186/s13071-015-1132-7), 2015-10-22
Supplement: 13071_2015_1132_MOESM1_ESM.pdf [file 13071_2015_1132_MOESM1_ESM.pdf]

## Additional file 1

**Table S1 - Description the basic LF model parameters and functions used in the model.**

| Parameter Symbol                                          | Definition ( <i>units</i> )                                                                                                                                                                                                                | Range                                         | Source            |
|-----------------------------------------------------------|--------------------------------------------------------------------------------------------------------------------------------------------------------------------------------------------------------------------------------------------|-----------------------------------------------|-------------------|
| <b>Intrinsic <i>Biological</i> parameters</b>             |                                                                                                                                                                                                                                            |                                               |                   |
| $\lambda$                                                 | Number of bites per mosquito ( <i>per month</i> )                                                                                                                                                                                          | [5, 15]                                       | [1]-[5]           |
| $\tau$                                                    | Pre-patency period ( <i>months</i> )                                                                                                                                                                                                       | [6, 9]                                        | [6]               |
| $s$                                                       | Proportion of female worms                                                                                                                                                                                                                 | 0.5                                           | -                 |
| $\mu$                                                     | Worm mortality rate ( <i>per month</i> )                                                                                                                                                                                                   | [0.008, 0.018]                                | [3]-[5],[7]-[10]  |
| $\alpha$                                                  | Production rate of microfilariae per worm ( <i>per month</i> )                                                                                                                                                                             | [0.25, 1.5]                                   | [3]-[5],[11]      |
| $\gamma$                                                  | Death rate of the microfilariae ( <i>per month</i> )                                                                                                                                                                                       | [0.08, 0.12]                                  | [4],[5],[9],[11]  |
| $\alpha_2$                                                | Production rate of CFA ( <i>per worm per month</i> )                                                                                                                                                                                       | [2, 8]                                        | This study        |
| $\gamma_2$                                                | Decay rate of CFA ( <i>per month</i> )                                                                                                                                                                                                     | [0.01, 0.05]                                  | This study        |
| $g$                                                       | Proportion of mosquitoes which pick up infection when biting an infected host                                                                                                                                                              | [0.259, 0.481]                                | [4],[5],[12]      |
| $\kappa$                                                  | Maximum level of L3 given mf density                                                                                                                                                                                                       | [3.955, 4.83]                                 | [4],[5]           |
| $k_0$                                                     | The basic location parameter of negative binomial distribution used in aggregation parameter ( $k = k_0 + k_{Lin}M$ )                                                                                                                      | [0.000036, 0.00077]                           | [4],[5],[13],[14] |
| $\delta$                                                  | Immunity waning rate ( <i>per month</i> )                                                                                                                                                                                                  | [0, 0.000001]                                 | [4],[5]           |
| <b>Extrinsic <i>Biological</i> parameters</b>             |                                                                                                                                                                                                                                            |                                               |                   |
| $V/H$                                                     | Ratio of number of vector to hosts                                                                                                                                                                                                         | $MBR / \lambda$                               | Data (Table 1)    |
| $k_{Lin}$                                                 | The linear rate of increase in the aggregation parameter defined above                                                                                                                                                                     | [0.00000024, 0.282]                           | [4],[5],[13],[14] |
| $\sigma$                                                  | Death rate of mosquitoes ( <i>per month</i> )                                                                                                                                                                                              | [1.5, 8.5]                                    | [4],[5],[15]      |
| $\psi_1$                                                  | Proportion of L3 leaving mosquito per bite                                                                                                                                                                                                 | [0.1, 0.8]                                    | [11]              |
| $\psi_2$                                                  | The establishment rate <sup>1</sup>                                                                                                                                                                                                        | [0.0000398, 0.00364]                          | [3]-[5],[15]      |
| $^{\#}H_{Lin}$                                            | A threshold value used in $h(a)$ to adjust the rate at which individuals of age $a$ are bitten: linear rise from 0 at age zero to 1 at age $H_{lin}$ in years.<br>$h(a) = a / H_{Lin}$ for $a < H_{Lin}$ ; $h(a) = 1$ for $a \geq H_{Lin}$ | [20, 50]                                      | Data (Table 1)    |
| $r$                                                       | Gradient of mf uptake <sup>2</sup>                                                                                                                                                                                                         | [0.04, 0.25]                                  | [4],[5]           |
| $c$                                                       | Strength of acquired immunity                                                                                                                                                                                                              | [0.0000003, 0.0109]                           | [4],[5]           |
| $I_C$                                                     | Strength of immunosuppression <sup>3</sup>                                                                                                                                                                                                 | [0.5, 5.5]                                    | [4],[5]           |
| $S_C$                                                     | Slope of immunosuppression function <sup>4</sup> ( <i>per worm/month</i> )                                                                                                                                                                 | [0.01, 0.20]                                  | [4],[5]           |
| <b>Description of the functions used in the model</b>     |                                                                                                                                                                                                                                            |                                               |                   |
| Function                                                  | Mathematical expression                                                                                                                                                                                                                    | Parameters                                    | Source            |
| <sup>#</sup> Probability that an individual is of age $a$ | $\pi(a) = A_0 \exp[-B_0 a]$                                                                                                                                                                                                                | $a$ - human age                               | [4],[5],[16]      |
| Adult worm mating                                         | $\phi[W(a,t), k] = 1 - \left(1 + \frac{W(a,t)}{2k}\right)^{-(1+k)}$                                                                                                                                                                        | $k$ - negative binomial aggregation parameter | [3]-[5],[17]      |

|                                  |                                                             |                                                                              |         |
|----------------------------------|-------------------------------------------------------------|------------------------------------------------------------------------------|---------|
| probability                      |                                                             |                                                                              |         |
| Immunity to larval establishment | $g_1[I(a,t)] = \frac{1}{1+cI(a,t)}$                         | $c$ - strength of immunity to larval establishment                           | [4],[5] |
| Host immune-suppression          | $g_2[W_T(a,t)] = \frac{1+I_C S_C W_T(a,t)}{1+S_C W_T(a,t)}$ | $I_C$ - strength of immunosuppression;<br>$S_C$ - slope of immunosuppression | [4],[5] |

<sup>1</sup>The proportion of L3-stage larvae infecting human hosts that survive to develop into adult worms [4].

<sup>2</sup>The gradient of mf uptake  $r$  is a measure of the initial increase in the infective L3 larvae uptake by vector as  $M$  increases from 0 [4],[16].

<sup>3</sup>The facilitated establishment rate of adult worms due to parasite-induced immunosuppression in a heavily infected human host

<sup>4</sup>The initial rate of increase by which the strength of immunosuppression is achieved as  $W$  increases from 0 [18].

<sup>#</sup>The parameters  $A_0$  and  $B_0$  are estimated from the human demographic data of a country. Similarly, the range of  $H_{Lin}$  were derived from the LF baseline mf/CFA age data.

The term  $f[M(a,t)]$  describes the functional form relating the L3-stage larval uptake and development in the vector population.

For *Anopheles* mosquitoes:

$$f[M(a,t)] = \left[ \frac{2}{\left[1 + \frac{M(a,t)}{k} \left(1 - \exp\left[-\frac{r}{\kappa}\right]\right)\right]^k} - \frac{1}{\left[1 + \frac{M(a,t)}{k} \left(1 - \exp\left[-\frac{2r}{\kappa}\right]\right)\right]^k} \right].$$

For *Culex* mosquitoes:

$$f[M(a,t)] = \left(1 + \frac{M(a,t)}{k} \left(1 - \exp\left[-\frac{r}{\kappa}\right]\right)\right)^{-k}.$$

## References

1. Rajagopalan PK. Population dynamics of *Culex pipiens fatigans*, the filariasis vector, in Pondicherry - influence of climate and environment. *Proc Ind Nat Science Acad.* 1980;B46:745-752.
2. Subramanian S, Manoharan A, Ramaiah KD, Das PK. Rates of Acquisition and Loss of *Wuchereria Bancrofti* Infection in *Culex Quinquefasciatus*. *Am J Trop Med Hyg.* 1994;51 2:244-249.
3. Gambhir M, Michael E. Complex ecological dynamics and eradicability of the vector borne macroparasitic disease, lymphatic filariasis. *PLoS One.* 2008;3 8:e2874; doi:10.1371/journal.pone.0002874.
4. Gambhir M, Bockarie M, Tisch D, Kazura J, Remais J, Spear R, et al. Geographic and ecologic heterogeneity in elimination thresholds for the major vector-borne helminthic disease, lymphatic filariasis. *BMC Biol.* 2010;8:22; doi:10.1186/1741-7007-8-22.
5. Singh BK, Bockarie MJ, Gambhir M, Siba PM, Tisch DJ, Kazura J, et al. Sequential modeling of the effects of mass drug treatments on Anopheline-mediated lymphatic filariasis infection in Papua New Guinea. *PLoS One.* 2013;8 6:e67004; doi:10.1371/journal.pone.0067004.
6. Scott AL. Lymphatic-dwelling Filariae. In: Nutman TB, editor. *Lymphatic Filariasis*. London: Imperial College Press; 2000. p. 5-39.
7. Vanamail P, Subramanian S, Das PK, Pani SP, Rajagopalan PK. Estimation of fecundic life span of *Wuchereria bancrofti* from longitudinal study of human infection in an endemic area of Pondicherry (south India). *Indian J Med Res.* 1990;91 July:293-297.
8. Evans DB, Gelband H, Vlassoff C. Social and economic factors and the control of lymphatic filariasis: A review. *Acta Trop.* 1993;53 1:1-26; doi:10.1016/0001-706X(93)90002-S.
9. Ottesen EA, Ramachandran CP. Lymphatic Filariasis Infection and Disease - Control Strategies. *Parasitol Today.* 1995;11 4:129-131.
10. Vanamail P, Ramaiah KD, Pani SP, Das PK, Grenfell BT, Bundy DAP. Estimation of the fecund life span of *Wuchereria bancrofti* in an endemic area. *Trans R Soc Trop Med Hyg.* 1996;90 2:119-121.
11. Hairston NG, de Meillon B. On the inefficiency of transmission of *Wuchereria bancrofti* from mosquito to human host. *Bull World Health Organ.* 1968;38 6:935-941.
12. Subramanian S, Krishnamoorthy K, Ramaiah KD, Habbema JDF, Das PK, Plaisier AP. The relationship between microfilarial load in the human host and uptake and development of *Wuchereria bancrofti* microfilariae by *Culex quinquefasciatus*: a study under natural conditions. *Parasitology.* 1998;116 03:243-255.
13. Subramanian S, Pani SP, Das PK, Rajagopalan PK. Bancroftian Filariasis in Pondicherry, South India: 2. Epidemiological Evaluation of the Effect of Vector Control. *Epidemiol Infect.* 1989;103 3:693-702.

14. Das PK, Manoharan A, Subramanian S, Ramaiah KD, Pani SP, Rajavel AR, et al. Bancroftian Filariasis in Pondicherry, South India: Epidemiological Impact of Recovery of the Vector Population. *Epidemiol Infect.* 1992;108 3:483-493.
15. Ho BC, Ewert A. Experimental transmission of filarial larvae in relation to feeding behaviour of the mosquito vectors. *Trans R Soc Trop Med Hyg.* 1967;61 5:663-666; doi:10.1016/0035-9203(67)90130-7.
16. Norman RA, Chan MS, Srividya A, Pani SP, Ramaiah KD, Vanamail P, et al. EPIFIL: the development of an age-structured model for describing the transmission dynamics and control of lymphatic filariasis. *Epidemiol Infect.* 2000;124 3:529-41.
17. May RM. Togetherness among Schistosomes: its effects on the dynamics of the infection. *Math Biosci.* 1977;35 3-4:301-343; doi:10.1016/0025-5564(77)90030-X.
18. Duerr HP, Dietz K, Eichner M. Determinants of the eradicability of filarial infections: a conceptual approach. *Trends Parasitol.* 2005;21 2:88-96; doi:10.1016/j.pt.2004.11.011.
